# Supplementary material for: A combination of resistance and endurance training increases leg muscle strength in COPD: An evidence-based recommendation based on systematic review with meta-analyses
Source: PubMed Central journal article supplement — Chron Respir Dis. 2015 May;12(2):132–45. doi: 10.1177/1479972315575318 (PMC4412880; doi:10.1177/1479972315575318), 2015-05
Supplement: Appendix_1.pdf [file Appendix_1.pdf]

## Appendix 1: Search strategy

### Overview of searched databases in the first search:

| Database                                           | Interface | Date:       |
|----------------------------------------------------|-----------|-------------|
| G-I-N International                                |           | 11.07.2013  |
| NICE (UK)                                          |           | 11.07.2013  |
| National Guideline Clearinghouse (USA)             |           | 09.07.2013  |
| Scottish Intercollegiate Guidelines Network (SIGN) |           | 09.07.2013  |
| HTA Database                                       |           | 09.07.2013  |
| The Cochrane Library                               |           | 09. 07 2013 |
| SBU, Sweden                                        |           | 09.07.2013  |
| Socialstyrelsen, Sweden                            |           | 11.07.2013  |
| Helsedirektoratet, Norway                          |           | 10.07.2013  |
| Kunnskapscentret, Norway                           |           | 10. 07.2013 |
| Pedro                                              |           | 12.07.2013  |
| OT-Seeker                                          |           | 10. 07.2013 |

| Database | Interface | Date:      |
|----------|-----------|------------|
| Medline  | Ovid      | 16.07.2013 |
| EMBASE   | Ovid      | 17.07.2013 |
| CINAHL   | Ebsco     | 16.07.2013 |
| PSYCINFO | OVID      | 15.07.2013 |

## Search strategy

### G-I-N international, 35 records

<http://www.g-i-n.net>

#### Search strategy

chronic obstruct\* OR copd OR coad, 35 records  
chronic pulm\*, no new findings  
chronic lung, no new findings  
chronic airway\* no new findings

### NICE: 53 records

<http://www.nice.org.uk>

#### Search strategy

COPD + guidance, 20 records  
COAD + guidance, 1 record, no new findings  
obstructive + guidance + respiratory (Condition and diseases), 26 records, 16 new records  
chronic obstructive + guidance + respiratory, 18 records , 1 new records  
chronic obstructive + guidance, 35 records, 13 new records  
chronic obstructive pulmonale + guidance, 2 records, no new findings  
chronic obstructive lung + guidance, 26 records, no new findings  
chronic obstructive airway + guidance, 18 records, 3 new records

### National Guideline Clearing house: 151 records

<http://www.guideline.gov>

**Search strategy:** 'chronic obstructive pulmonary or copd or coad or chronic obstructive lung or chronic obstructive airway'

### Scottish Intercollegiate Guidelines Network (SIGN): 8 records

**Search strategy:** Respiratory Medicine

### The HTA-database: 74 records

<http://www.crd.york.ac.uk/CRDWeb/>

#### Search strategy:

| Line | Search                                                                   | Hits |        |
|------|--------------------------------------------------------------------------|------|--------|
| 1    | MeSH DESCRIPTOR Pulmonary Disease, Chronic Obstructive EXPLODE ALL TREES | 376  | Delete |
| 2    | * IN HTA FROM 2002 TO 2013                                               | 9073 | Delete |
| 3    | #1 AND #2                                                                | 51   | Delete |
| 4    | (copd) OR (coad) IN HTA FROM 2002 TO 2013                                | 46   | Delete |
| 5    | (lung) OR (pulmon*) OR (airway*) IN HTA FROM 2002 TO                     | 450  | Delete |

|   |                                                    |    |        |
|---|----------------------------------------------------|----|--------|
|   | 2013                                               |    |        |
| 6 | (chronic) AND (obstruct*) IN HTA FROM 2002 TO 2013 | 80 | Delete |
| 7 | #5 AND #6                                          | 71 | Delete |
| 8 | #3 OR #4 OR #7                                     | 74 | Delete |

### **SBU, Sweden, 4 records**

<http://www.sbu.se/sv/>

Search strategy:

*kol*, 4 records, but only 2 relevant records

*kroniskt obstruktiv lungsjukdom* 4 records 3 duplicates, 1 new record.

*kronisk lunge*, no new findings

*kronisk obstruktiv*, no new findings

*lunge*, 20 records, 1 new record

*Luftvägssjukdom*, 1 record, but not relevant

### **Socialstyrelsen, Sweden, 16 records**

<http://www.socialstyrelsen.se>

Search strategy:

*kroniskt obstruktiv lungsjukdom + publikationer*, 5, records

*kroniskt obstruktiv lungsjukdom + Föreskrifter och allmänna råd*, 1 record

*KOL + publikationer*, 6 records

*KOL + Nyheter og konferencer*, 4 records

### **Helsedirektoratet, Norway, 3 records**

<http://helsedirektoratet.no>

Search strategy:

*KOLS + Publikasjoner*, 1 record

*Lungesykdommer*, 2 records

### **Kunnskapssenteret, Norway, 23 records**

<http://www.kunnskapssenteret.no>

Search strategy:

*KOLS + Publikasjoner*, 20 records

*KOLS + Prosjekter*, 0 records

*KOLS + Rehabilitering*, 0 records

*Lungesykdom + Rehabilitering*, 0 records

*KOLS + kvalitetsforbedring*, 1 record, but no new

*Lungesykdom + kvalitetsforbedring*, 0 records

*kronisk obstruktiv lungesykdom + Publikasjoner*, 10 records, 3 new records

*kronisk obstruktiv lungesykdom + Prosjekter*, 0 records

*lungesykdom + prosjekter*, 0 records

**Pedro, 174 records**

<http://www.pedro.org.au>

Search strategy:

Topic: chronic respiratory disease + Practice guideline, 30 records

Topic: chronic respiratory disease + Systematic review, 144 records

**OT-Seeker, 35 records fund**

<http://www.otseeker.com>

Search strategy:

copd OR coad OR chronic obstructive\* + Systematic Review 35 records

obstruct\* AND lung + systematic review, 7 records, no new findings

obstruct\* AND pulmon\* + systematic review, 33 records, no new findings

obstruct\* AND airway\* + systematic review, 8 records, 1 new record, but not relevant.

**The Cochrane Library: 275 records fund (80 reviews and 195 other reviews)**

<http://www.thecochranelibrary.com/>

Search strategy:

#1 MeSH descriptor: [Pulmonary Disease, Chronic Obstructive] explode all trees

#2 pulmonary:ti,ab,kw (Word variations have been searched)

#3 lung:ti,ab,kw (Word variations have been searched)

#4 airway:ti,ab,kw (Word variations have been searched)

#5 #2 or #3 or #4

#6 chronic obstructive:ti,ab,kw (Word variations have been searched)

#7 #5 and #6

#8 #1 or #7

**Medline (OVID), 275 records fund**

Database: Ovid MEDLINE(R) In-Process & Other Non-Indexed Citations and Ovid MEDLINE(R) <1946 to Present>

Search Strategy:

- 
- 1 exp Pulmonary Disease, Chronic Obstructive/ or (copd or coad).mp. (33486)
  - 2 (obstruct\* and (pulmon\* or lung or airway\* or airflow\*)).mp. (98524)
  - 3 1 and 2 (31238)
  - 4 1 or 3 (33486)
  - 5 exp guideline/ or guideline\*.ti. (62221)
  - 6 4 and 5 (442)
  - 7 limit 6 to ((danish or english or norwegian or swedish) and yr="2002 – Current") (275)

**EMBASE (OVID), 1174 records fund**

Database: Embase <1974 to 2013 Week 28>

Search Strategy:

- 
- 1 exp \*chronic obstructive lung disease/ (40865)
  - 2 practice guideline/ or guideline\*.mp. (376951)

3 1 and 2 (2329)  
 4 limit 3 to ((danish or english or norwegian or swedish) and yr="2002 -Current") (1602)  
 5 exp chronic obstructive lung disease/ or (copd or coad).mp. (74316)  
 6 (obstruct\* and (pulmon\* or lung or airway\* or airflow\*)).mp. (143296)  
 7 5 or 6 (148101)  
 8 practice guideline/ or guideline\*.mp. (376951)  
 9 7 and 8 (6031)  
 10 limit 9 to ((danish or english or norwegian or swedish) and yr="2013 -Current") (270)  
 11 4 or 10 (1785)  
 12 exp rehabilitation/ or (rehab\* or occupational therap\*).mp. (320155)  
 13 exp physiotherapy/ or (physical therap\* or physiotherap\*).mp. (71685)  
 14 12 or 13 (370613)  
 15 fitness/ or endurance/ or (physical endurance or physical function).mp. (47768)  
 16 exp exercise/ or exercise test/ or exp walking/ or (walking or shuttle walking test\*).mp.  
 (301013)  
 17 15 or 16 (328028)  
 18 exp smoking cessation/ or smoking.mp. (273075)  
 19 exp nutritional status/ or nutrition/ or exp diet therapy/ or (nutrition\* or diet).mp. (731951)  
 20 body mass/ or (body mass or BMI).mp. (241743)  
 21 19 or 20 (918999)  
 22 patient education/ or social support/ (134596)  
 23 adaptive behavior/ or coping behavior/ or empowerment/ (78274)  
 24 patient participation/ or exp self care/ (60926)  
 25 (psychological adaption or coping or empowerment or Self Management or adherence).mp.  
 (166798)  
 26 22 or 23 or 24 or 25 (359619)  
 27 14 or 17 or 18 or 21 or 26 (2016728)  
 28 11 and 27 (959)  
 29 chronic obstructive lung disease/rh, th and (practice guideline/ or guideline\*.mp.) (919)  
 30 28 or 29 (1529)  
 31 limit 30 to ((danish or english or norwegian or swedish) and yr="2002 -Current") (1174)

\*\*\*\*\*

## CINAHL (EBSCO Host), 404 records fund

Search strategy:

| Search ID# | Search Terms                              | Search Options                                                                                                                    | Last Run Via                                                                           | Results |
|------------|-------------------------------------------|-----------------------------------------------------------------------------------------------------------------------------------|----------------------------------------------------------------------------------------|---------|
| S11        | S6 AND S9                                 | Limiters - Published Date from: 20020101-20131231; Language: Danish, English, Norwegian, Swedish<br>Search modes - Boolean/Phrase | Interface - EBSCOhost Search Screen - Advanced Search Database - CINAHL with Full Text | 404     |
| S10        | S6 AND S9                                 | Search modes - Boolean/Phrase                                                                                                     | Interface - EBSCOhost Search Screen - Advanced Search Database - CINAHL with Full Text | 464     |
| S9         | S7 OR S8                                  | Search modes - Boolean/Phrase                                                                                                     | Interface - EBSCOhost Search Screen - Advanced Search Database - CINAHL with Full Text | 39,717  |
| S8         | TI guideline*                             | Search modes - Boolean/Phrase                                                                                                     | Interface - EBSCOhost Search Screen - Advanced Search Database - CINAHL with Full Text | 18,324  |
| S7         | (MH "Practice Guidelines")                | Search modes - Boolean/Phrase                                                                                                     | Interface - EBSCOhost Search Screen - Advanced Search Database - CINAHL with Full Text | 30,146  |
| S6         | S1 OR S2 OR S5                            | Search modes - Boolean/Phrase                                                                                                     | Interface - EBSCOhost Search Screen - Advanced Search Database - CINAHL with Full Text | 16,134  |
| S5         | S3 AND S4                                 | Search modes - Boolean/Phrase                                                                                                     | Interface - EBSCOhost Search Screen - Advanced Search Database - CINAHL with Full Text | 15,714  |
| S4         | obstruct*                                 | Search modes - Boolean/Phrase                                                                                                     | Interface - EBSCOhost Search Screen - Advanced Search Database - CINAHL with Full Text | 23,334  |
| S3         | pulmon* OR lung OR airway*<br>OR airflow* | Search modes - Boolean/Phrase                                                                                                     | Interface - EBSCOhost Search Screen - Advanced Search Database - CINAHL with Full Text | 75,205  |
| S2         | copd OR coad                              | Search modes - Boolean/Phrase                                                                                                     | Interface - EBSCOhost Search Screen - Advanced Search Database - CINAHL with Full Text | 5,355   |
| S1         | (MH "Pulmonary Disease,                   | Search modes - Boolean/Phrase                                                                                                     | Interface - EBSCOhost                                                                  | 6,618   |

|  |                        |  |                                                                           |  |
|--|------------------------|--|---------------------------------------------------------------------------|--|
|  | Chronic Obstructive+") |  | Search Screen -<br>Advanced Search<br>Database - CINAHL<br>with Full Text |  |
|--|------------------------|--|---------------------------------------------------------------------------|--|

**PsycINFO, 55 records fund**

Database: PsycINFO <1806 to July Week 2 2013>

Search Strategy:

- 
- 1 exp Chronic Obstructive Pulmonary Disease/ (681)
  - 2 (copd or coad).mp. (849)
  - 3 (obstruct\* and (pulmon\* or lung or airway\*)).mp. (2177)
  - 4 1 or 2 or 3 (2399)
  - 5 treatment guidelines/ (3872)
  - 6 guideline\*.mp. (40056)
  - 7 5 or 6 (40056)
  - 8 4 and 7 (61)
  - 9 limit 8 to ((danish or english or norwegian or swedish) and yr="2002 – Current") (55)

\*\*\*\*\*

## Second search:

### Systematic Reviews, Meta-analysis and guidelines

Medline og Embase, 134 records fund, after duplicate search: 108 records.

Search conducted: 11.11.2013

### Medline, 46 records fund.

Database: Ovid MEDLINE(R) In-Process & Other Non-Indexed Citations and Ovid MEDLINE(R) <1946 to Present> Search Strategy:

-----

```
1      exp Pulmonary Disease, Chronic Obstructive/ or (copd or coad).mp. (35070)
2      Weight Lifting/ (4003)
3      exp Resistance Training/ (3134)
4      motion therapy, continuous passive/ or muscle stretching exercises/ (1465)
5      static exercise.ti,ab. (423)
6      muscle training.ti,ab. (1484)
7      isometric exercise*.ti,ab. (1611)
8      isokinetic exercise*.ti,ab. (234)
9      (anaerobic exercise* or aerobic exercise*).ti,ab. (5505)
10     Strength training.ti,ab. (2930)
11     workout*.ti,ab. (656)
12     body building.ti,ab. (170)
13     exp Muscle Strength/ (17870)
14     2 or 3 or 4 or 5 or 6 or 7 or 8 or 9 or 10 or 11 or 12 or 13 (34948)
15     1 and 14 (468)
16     meta-analysis/ (51581)
17     exp guideline/ (25320)
18     (systematic review or meta analysis).ti,ab. (86887)
19     exp Evidence-Based Medicine/ (55611)
20     16 or 17 or 18 or 19 (177722)
21     15 and 20 (41)
22     limit 15 to (guideline or meta analysis or practice guideline or systematic
reviews) (44)
23     21 or 22 (46)
```

\*\*\*\*\*



## Embase, 88 records fund

Database: Embase <1980 to 2013 Week 45>

Search Strategy:

```
-----  
1      exp Pulmonary Disease, Chronic Obstructive/ or (copd or coad).mp. (75361)  
2      exp resistance training/ (4683)  
3      exp weight lifting/ (3744)  
4      arm exercise/ or isokinetic exercise/ or isometric exercise/ or muscle  
training/ or static exercise/ (10072)  
5      workout*.ti,ab. (845)  
6      (anaerobic exercise* or aerobic exercise*).ti,ab. (6705)  
7      Strength training.ti,ab. (3313)  
8      body building.ti,ab. (280)  
9      muscle training.ti,ab. (1828)  
10     muscle stretching.ti,ab. (277)  
11     exp muscle strength/ (30912)  
12     2 or 3 or 4 or 5 or 6 or 7 or 8 or 9 or 10 or 11 (52574)  
13     1 and 12 (1266)  
14     evidence based medicine/ or consensus development/ or meta analysis/ or  
"meta analysis (topic)"/ or outcomes  
research/ or "systematic review"/ or "systematic review (topic)"/ (271326)  
15     13 and 14 (103)  
16     limit 13 to (evidence based medicine or concensus development or meta  
analysis or outcomes research or  
"systematic review") (96)  
17     15 or 16 (103)  
18     limit 17 to ((danish or english or norwegian or swedish) and yr="2002 -  
Current") (87)  
19     (systematic review or meta analysis).ti. (63018)  
20     14 or 19 (284674)  
21     13 and 20 (106)  
22     16 or 21 (106)  
23     limit 22 to ((danish or english or norwegian or swedish) and yr="2002 -  
Current") (88)
```

\*\*\*\*\*

## Randomized Controlled Trials

Search in MEDLINE and EMBASE . Search conducted: 27.11.2013. We found 1254 records, after duplicate search we found 750 records.

### Medline, 649 records found.

Database: Ovid MEDLINE(R) In-Process & Other Non-Indexed Citations and Ovid MEDLINE(R) <1946 to Present> Search Strategy:

-----

- 1 Weight Lifting/ (4008)
- 2 exp Resistance Training/ (3160)
- 3 motion therapy, continuous passive/ or muscle stretching exercises/ (1472)
- 4 static exercise.ti,ab. (424)
- 5 muscle training.ti,ab. (1488)
- 6 isometric exercise\*.ti,ab. (1613)
- 7 isokinetic exercise\*.ti,ab. (235)
- 8 (anaerobic exercise\* or aerobic exercise\*).ti,ab. (5532)
- 9 Strength training.ti,ab. (2947)
- 10 workout\*.ti,ab. (663)
- 11 body building.ti,ab. (170)
- 12 exp Muscle Strength/ (17961)
- 13 exp Exercise Movement Techniques/ (5321)
- 14 exp \*Exercise Test/ (14746)
- 15 Exercise Tolerance/ (8505)
- 16 \*Physical Endurance/ (8937)
- 17 (exercise adj (testing or tolerance or capacity)).ti,ab. (20868)
- 18 ((stress or treadmill or step) adj testing).ti,ab. (4933)
- 19 (shuttle adj2 walk\*).ti,ab. (389)
- 20 1 or 2 or 3 or 4 or 5 or 6 or 7 or 8 or 9 or 10 or 11 or 12 or 13 or 14 or
- 15 or 16 or 17 or 18 or 19 (83767)
- 21 exp Pulmonary Disease, Chronic Obstructive/ (24710)
- 22 (chronic obstructive pulmonary disease or coad or copd).ti,ab. (38238)
- 23 (chronic obstructive lung disease or lung disease chronic
- obstructive).ti,ab. (3034)
- 24 21 or 22 or 23 (44777)
- 25 20 and 24 (3311)
- 26 randomized controlled trial/ or ((randomized or randomised) adj2
- trial).ti,ab. or rct.ti,ab. (425466)
- 27 25 and 26 (687)
- 28 limit 27 to (danish or english or norwegian or swedish) (649)

## Embase , 605 records found

Database: Embase <1974 to 2013 November 26> Search Strategy:

-----

- 1 exp resistance training/ (4781)
- 2 exp weight lifting/ (3821)
- 3 arm exercise/ or isokinetic exercise/ or isometric exercise/ or muscle training/ or static exercise/ (10353)
- 4 workout\*.ti,ab. (855)
- 5 (anaerobic exercise\* or aerobic exercise\*).ti,ab. (6756)
- 6 Strength training.ti,ab. (3357)
- 7 body building.ti,ab. (286)
- 8 muscle training.ti,ab. (1864)
- 9 muscle stretching.ti,ab. (289)
- 10 muscle training/ (4714)
- 11 exp \*kinesiotherapy/ (22914)
- 12 exp \*exercise/ or exp muscle exercise/ (104828)
- 13 (exercise adj (testing or tolerance or capacity)).ti,ab. (26741)
- 14 ((stress or treadmill or step) adj testing).ti,ab. (6442)
- 15 (shuttle adj2 walk\*).ti,ab. (536)
- 16 exercise tolerance/ (10823)
- 17 1 or 2 or 3 or 4 or 5 or 6 or 7 or 8 or 9 or 10 or 11 or 12 or 13 or 14 or 15 or 16 (162372)
- 18 exp chronic obstructive lung disease/ (70846)
- 19 (chronic obstructive pulmonary disease or coad or copd).ti,ab. (49748)
- 20 (chronic obstructive lung disease or lung disease chronic obstructive).ti,ab. (4080)
- 21 18 or 19 or 20 (81194)
- 22 17 and 21 (5021)
- 23 randomized controlled trial/ or ((randomized or randomised) adj2 trial).ti,ab. or rct.ti,ab. (414459)
- 24 22 and 23 (655)
- 25 limit 24 to (danish or english or norwegian or swedish) (605)

## **PEDRO, 89 records found**

We found 89 records, after duplicate search: 18 new records.

Search conducted: 11.12.2013

### **Search strategy:**

Therapy: strength training AND topic: chronic respiratory disease AND Method: clinical trial

From year 2002 -
