# Supplementary material for: A combination of resistance and endurance training increases leg muscle strength in COPD: An evidence-based recommendation based on systematic review with meta-analyses
Source: PubMed Central journal article supplement — Chron Respir Dis. 2015 May;12(2):132–45. doi: 10.1177/1479972315575318 (PMC4412880; doi:10.1177/1479972315575318), 2015-05
Supplement: Appendix_2.pdf [file Appendix_2.pdf]

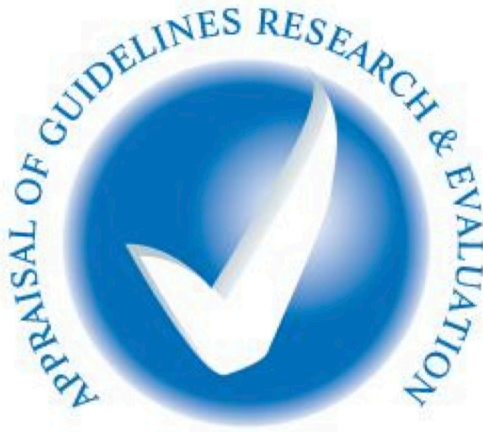

# AGREE II

**A critical group appraisal of:  
Optimizing pulmonary rehabilitation in  
chronic obstructive pulmonary  
disease--practical issues: a Canadian  
Thoracic Society Clinical Practice  
Guideline  
using the AGREE II Instrument**

Created with the AGREE II Online Guideline Appraisal Tool.

No endorsement of the content of this document by the AGREE Research Trust should be implied.

Co-ordinator: Ulrik Winning Iepsen

Date: 25 October 2013

Email: [ulrik\\_winning@hotmail.com](mailto:ulrik_winning@hotmail.com)

URL of this appraisal: <http://www.agreetrust.org/group-appraisal/211>

Guideline URL: [www.refworks.com](http://www.refworks.com)
