# Supplementary material for: A combination of resistance and endurance training increases leg muscle strength in COPD: An evidence-based recommendation based on systematic review with meta-analyses
Source: PubMed Central journal article supplement — Chron Respir Dis. 2015 May;12(2):132–45. doi: 10.1177/1479972315575318 (PMC4412880; doi:10.1177/1479972315575318), 2015-05
Supplement: Appendix_3.pdf [file Appendix_3.pdf]

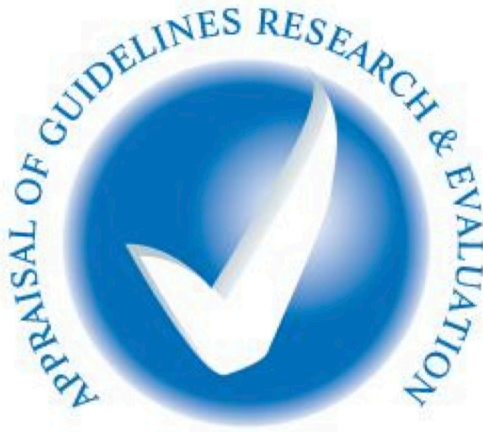

# AGREE II

## **A critical group appraisal of: British Thoracic Society guideline on pulmonary rehabilitation in adults. using the AGREE II Instrument**

Created with the AGREE II Online Guideline Appraisal Tool.

No endorsement of the content of this document by the AGREE Research Trust should be implied.

Co-ordinator: Ulrik Winning Iepsen

Date: 24 October 2013

Email: [ulrik\\_winning@hotmail.com](mailto:ulrik_winning@hotmail.com)

URL of this appraisal: <http://www.agreetrust.org/group-appraisal/208>

Guideline URL: [http://thorax.bmj.com/content/68/Suppl\\_2/ii1](http://thorax.bmj.com/content/68/Suppl_2/ii1)
