# Supplementary material for: A combination of resistance and endurance training increases leg muscle strength in COPD: An evidence-based recommendation based on systematic review with meta-analyses
Source: PubMed Central journal article supplement — Chron Respir Dis. 2015 May;12(2):132–45. doi: 10.1177/1479972315575318 (PMC4412880; doi:10.1177/1479972315575318), 2015-05
Supplement: Appendix_4.pdf [file Appendix_4.pdf]

## Appendix 4: AMSTAR (A Measurement Tool to Asses Systematic Reviews) assessment of the included systematic reviews

| Observer  | Citation    | Was meta-analysis performed for the relevant outcomes? | 1. Was an 'a priori' design provided? | 2. Was there duplicate study selection and data extraction? | 3. Was a comprehensive literature search performed? | 4. Was the status of publication (i.e. grey literature) used as an inclusion criterion? | 5. Was a list of studies (included and excluded) provided? | 6. Were the characteristics of the included studies provided? | 7. Was the scientific quality of the included studies assessed and documented? | 8. Was the scientific quality of the included studies used appropriately in formulating conclusions? | 9. Were the methods used to combine the findings of studies appropriate? | 10. Was the likelihood of publication bias assessed? | 11. Was the conflict of interest included? | <b>Total score</b> |
|-----------|-------------|--------------------------------------------------------|---------------------------------------|-------------------------------------------------------------|-----------------------------------------------------|-----------------------------------------------------------------------------------------|------------------------------------------------------------|---------------------------------------------------------------|--------------------------------------------------------------------------------|------------------------------------------------------------------------------------------------------|--------------------------------------------------------------------------|------------------------------------------------------|--------------------------------------------|--------------------|
| consensus | O'Shea 2009 | Yes                                                    | Can't answer                          | Yes                                                         | Yes                                                 | Can't answer                                                                            | No                                                         | Yes                                                           | Yes                                                                            | Yes                                                                                                  | Yes                                                                      | No                                                   | Yes                                        | <b>7</b>           |
| consensus | Puhan 2005  | Yes                                                    | Can't answer                          | Yes                                                         | Yes                                                 | Yes                                                                                     | No                                                         | Yes                                                           | Yes                                                                            | Yes                                                                                                  | Yes                                                                      | No                                                   | Yes                                        | <b>8</b>           |
